1 Precise exogenous insertion and sequence replacements in poplar  
2 by simultaneous HDR overexpression and NHEJ suppression using  
3 CRISPR-Cas9  
4

5 Ali Movahedi<sup>1§</sup>, Hui Wei<sup>1§</sup>, Xiaohong Zhou<sup>2§</sup>, Jake C. Fountain<sup>3§</sup>, Zhong-Hua Chen<sup>4</sup>, Zhiying Mu<sup>2</sup>,  
6 Weibo Sun<sup>1</sup>, Jiixin Zhang<sup>5</sup>, Dawei Li<sup>1</sup>, Baozhu Guo<sup>6</sup>, Rajeev K. Varshney<sup>7,8\*</sup>, Liming Yang<sup>1\*</sup>, Qiang  
7 Zhuge<sup>1\*</sup>  
8

9 <sup>1</sup> College of Biology and the Environment, Co-Innovation Center for Sustainable Forestry in  
10 Southern China, Key Laboratory of Forest Genetics & Biotechnology, Ministry of Education,  
11 Nanjing Forestry University, Nanjing 210037, China

12 <sup>2</sup> College of Forestry and Biotechnology, Zhejiang Agriculture and Forestry University, Hangzhou  
13 311300, China

14 <sup>3</sup> Department of Biochemistry, Molecular Biology, Entomology, and Plant Pathology, Mississippi  
15 State University, Mississippi State, MS 39762, USA

16 <sup>4</sup> School of Science, Hawkesbury Institute for the Environment, Western Sydney University,  
17 Penrith, NSW 2751, Australia

18 <sup>5</sup> School of Food Science and Pharmaceutical Engineering, Nanjing Normal University, Nanjing  
19 210046, China

20 <sup>6</sup> USDA - ARS, Crop Genetics and Breeding Research Unit, Tifton, GA 31793, USA

21 <sup>7</sup> Center of Excellence in Genomics & Systems Biology, International Crops Research Institute for  
22 the Semi-Arid Tropics (ICRISAT), Hyderabad 502324, India

23 <sup>8</sup> State Agricultural Biotechnology Centre, Centre for Crop and Food Innovation, Food Futures  
24 Institute, Murdoch University, Murdoch, Western Australia 6150, Australia  
25  
26  
27

28 \*Correspondences: [r.k.varshney@cgiar.org](mailto:r.k.varshney@cgiar.org)/ [rajeev.varshney@murdoch.edu.au](mailto:rajeev.varshney@murdoch.edu.au);  
29 [qzhuge@njfu.edu.cn](mailto:qzhuge@njfu.edu.cn); [yangliming@njfu.edu.cn](mailto:yangliming@njfu.edu.cn)  
30

31 § These authors contributed equally and can be considered as joint first authors.  
32  
33  
34  
35  
36  
37  
38  
39  
40  
41  
42

43 **CRISPR-mediated genome editing has become a powerful tool for genetic modification of**  
44 **biological traits. However, developing an efficient, site-specific, gene knock-in system based**  
45 **on homology-directed DNA repair (HDR) remains a significant challenge in plants, especially**  
46 **in woody species like poplar. Here, we show that simultaneous inhibition of non-homologous**  
47 **end joining (NHEJ) recombination cofactor XRCC4 and overexpression of HDR enhancer**  
48 **factors CtIP and MRE11 can improve the HDR efficiency for gene knock-in. Using this**  
49 **approach, the *BleoR* gene was integrated onto the 3' end of the *MKK2* MAP Kinase gene to**  
50 **generate a *BleoR*-*MKK2* fusion protein. Based on exogenous *BleoR* expression, the HDR-**  
51 **mediated knock-in efficiency was up to ~40-fold greater when using a *XRCC4* silencing**  
52 **incorporated with a combination of *CtIP* and *MRE11* overexpression compared to no HDR**  
53 **enhancement or NHEJ silencing. Furthermore, this corporation of HDR enhancer**  
54 **overexpression and NHEJ repression also resulted in 7-fold fewer CRISPR-induced Insertions**  
55 **and Deletions (InDels), resulting in no functional effects on *MKK2*-based salt stress responses**  
56 **in poplar. Therefore, this approach may be useful not only in poplar and plants or crops but**  
57 **also in mammals for improving CRISPR-mediated gene knock-in efficiency.**

58 Several studies have been carried out on methods to improve crop genetic modification  
59 by CRISPR-mediated donor-dependent HDR<sup>1</sup>, such as increasing *ARGOS8* expression by  
60 replacing *GOS2* promoter with HDR and enhancing the efficiency of 35S promoter insertion  
61 upstream of *ANT1* gene in tomato <sup>2</sup>. Several publications have reported the successful  
62 generation of null mutations in woody plants using NHEJ pathway since being implemented in  
63 poplar <sup>3,4</sup>. However, precise gene targeting and replacement have only been reported in model  
64 plants such as *Arabidopsis* <sup>5</sup> and rice <sup>6</sup>. No report has yet shown efficient HDR for gene  
65 replacement in woody perennials.

66 One of the main limitations of HDR efficiency is inadequate delivery of donor DNA  
67 patterns (DDPs) into nuclei. Previous studies have indicated that it is necessary to increase the  
68 number of cells containing DDPs at S/G2 cell division phases to increase HDR efficiency <sup>7</sup>.  
69 Several traditional strategies have been applied to enrich DDP availability and introduction into  
70 cells, including particle bombardment <sup>8</sup>, protoplast <sup>9</sup>, geminiviral-based replication <sup>10</sup>, and RNA  
71 transcription <sup>1</sup>, but it remains a significant problem for woody plants. Although genes

72 introduced by *Agrobacterium* are stable and the method is widely used to transduce genes into  
73 woody plant cells<sup>11,12</sup>, there were few reports on enhancing the efficiency of transferring DDPs  
74 and, consequently, the recovery of DSBs by HDR<sup>13,14</sup>.

75 Efforts to increase HDR efficiency through the introduction of HDR-promoting effectors  
76 have been attempted. Expression of Cas9 fusion proteins with HDR-enhancers *MRE11*, *CtIP*, or  
77 *Rad52* has been shown to enhance HDR efficiency in human cells while significantly decreasing  
78 NHEJ with at least a 2-fold increase HDR and a 6-fold increase in HDR/NHEJ ratio<sup>15</sup>. However,  
79 little attention has been paid on the role of these proteins in plants to increase the HDR  
80 efficiency<sup>16</sup>. In contrast, the inhibition of DNA ligase IV (*LIG4*), Ku 70, and Ku 80, which are  
81 outwardly involved only in NHEJ, has been shown to increase HDR efficiency up to 16-fold in  
82 *Arabidopsis*<sup>17</sup>. The X-ray repair cross-complementing protein 4 (*XRCC4*) is another critical NHEJ  
83 factor that has not yet been extensively considered for its interfering effect on HDR efficiency in  
84 plants. *XRCC4* is one cofactor of *LIG4* to interact with *KU 70* and *KU 80* and ligate the DSB<sup>18,19</sup>.

85 To date, there was no report combining HDR factor overexpression (i.e., *CtIP* and *MRE11*)  
86 and NHEJ factor suppression (i.e., *XRCC4*) to promote the HDR pathway in plants. In contrast to  
87 gene mutation via CRISPR-Cas9 systems, precise gene targeting and knock-in by homologous  
88 recombination are more challenging but necessary as a versatile tool for research and breeding  
89 in crops and woody plants. Therefore, our objective was to examine the effects of HDR cofactor  
90 overexpression (*CtIP* and *MRE11*<sup>15</sup>) and simultaneous disruption of NHEJ promoter *XRCC4*<sup>20</sup> on  
91 knock-in efficiency using the *MKK2* gene as a case study. Mitogen-activated protein kinases  
92 (MAPKs or MPKs) like *MKK2* are involved in several key pathways responding to stresses,  
93 including disease, drought, cold, heat shock, osmotic, and salt stresses<sup>21,22</sup>.

94 Regarding highly efficient CRISPR-mediated homozygous mutations in poplars<sup>23</sup>,  
95 the *MKK2* gene was targeted to integrate the Zeocin resistance gene *BleoR* onto its 3' end in  
96 the poplar genome (Figure 1a). The *MKK2* gene was targeted to integrate the Zeocin resistance  
97 gene *BleoR* onto its 3' end in the poplar genome (Figure 1a). The guide RNA (gRNA) was  
98 designed near the 3' UTR with the highest activity score and no off-target effects on CDS to  
99 avoid effects on *MKK2* expression and function and less chance of off-target CRISPR activity<sup>24,25</sup>  
100 (Figure 1a and Supplementary Table 1). According to Song et al.<sup>26</sup>, lengths of homologous arms

101 were optimized for use in homologous recombination and *BleoR* integration to 400 bp  
102 upstream and downstream of the PAM site designated as the 5' and 3' homology arms,  
103 respectively (Figure 1b). The DDP cassette was ligated into the pRGEB31 vector containing the  
104 Cas9 expression cassette to construct the pDDP vector (Supplementary Figure 1). Multiple  
105 fusion vectors were also constructed to manipulate HDR and NEHJ cofactors, including the Cas9  
106 expression cassette, *CtIP* overexpression cassette, *MRE11* overexpression cassette,  
107 and *XRCC4* mutative cassette (Supplementary Figure 2a-d). We used the pathogenic suspension  
108 of *Agrobacterium tumefaciens* with an  $OD_{600} = 2.5$  ( $\sim 2 \times 10^9$  cell  $ml^{-1}$ ) and the ratio of 4:1  
109 pDDP/pgRNA to provide an excess of DDP fragments during S/G2 cell division<sup>15</sup> and to avoid  
110 off-target editing caused by the extra accumulation of pgRNA<sup>27</sup> (Figure 1c). Actively growing  
111 buds on Zeocin-containing selection medium were assumed to be positive transformants and  
112 were selected and rooted. The recovered events were then used for further analyses (Figure 1c).

113 To examine the effect of increasing HDR effector expression and disruption of NHEJ  
114 component on knock-in efficiency, the pDDP cassette was co-transformed with one of five  
115 additional constructs in a 4:1 concentration ratio: pgRNA (Experiment I; ExI), pgCtIP  
116 overexpressing HDR effector CtIP (Experiment II; ExII), pgMR overexpressing HDR effector  
117 MRE11 (Experiment III; ExIII), pgCtMR overexpressing both CtIP and MRE11 (Experiment IV;  
118 ExIV), and pggCtMR overexpressing both CtIP and MRE11 along with CRISPR-based disruption of  
119 NHEJ effector XRCC4 (Experiment V; ExV) (Figure 1d; Supplementary Figure 2). While ExI  
120 resulted in no successfully recovered lines being generated from nine grown buds, ExII and ExIII  
121 resulted in one recovered event from 17 and 15 grown buds, respectively (Figure 1d).  
122 Combining CtIP and MRE11 overexpression, ExIV resulted in four recovered events from 22  
123 grown buds (Figure 1d). Seeing the positive influence of HDR effectors overexpression but still  
124 being unable to overcome the influence of NHEJ, pDDP was co-transformed with pggCtMR in  
125 ExV, resulting in a significant increase in recovered events to twelve from 31 grown buds (Figure  
126 1d), which suggested that simultaneous overexpression of *CtIP* and *MRE11* and disruption of  
127 *XRCC4* resulted in a 3.4-fold increase in knock-in efficiency of the *BleoR* gene indicated by bud  
128 recovery compared to ExI.

129 In light of these results, Western blotting, RT-PCR, and Southern blotting were used to  
130 verify that HDR occurred in recovered transformants and to confirm the proper integration of  
131 *BleoR* to the 3' end of the *MKK2* gene. A 6X His tag was fused with the *BleoR* C-terminal (Figure  
132 1b) followed by Poly-A tail to show the integration of *BleoR* into target genomes using Western  
133 blotting. While screening the transformants grown on Zeocin using Western blotting, no edited  
134 events were detected in ExI, but one event showed a band of 54 KDa in ExII (Figure 2a;  
135 Uncropped documents in Supplementary Figure 16), which represents the successful  
136 integration of *BleoR* (~13.7 KDa) fused with *MKK2* (~40.5 KDa) (Figure 2b). In screening events  
137 in ExIII, only one with a band of 13.7 KDa (Figure 2a) was identified, suggesting that the *BleoR*  
138 CDS were integrated but did not successfully form a fusion protein with *MKK2* possibly due to  
139 mutation or knock out *MKK2* exons 7, 8, or 9 (Figure 2b). Screening events in ExIV showed three  
140 events with about 54 KDa bands and one event with about 14 KDa (Figure 2a). However,  
141 simultaneous HDR effector overexpression and NHEJ suppression in ExV resulted in ten events  
142 with about 54 KDa bands and two events with about 14 kDa bands (Figure 2a).

143 RT-PCR assays were performed to evaluate the accuracy of *MKK2* editing and to ensure  
144 the proper orientation of the insertion of *BleoR* at the 3' end of *MKK2* exon 8 in the recovered  
145 transformants (Figure 1d). The first RT-PCR experiment was designed to determine whether  
146 HDR was successful and proper *MKK2* gene transcription occurred in the transformants (Figure  
147 2c and d). A 920 bp region spanning exons 3 – 9 was amplified, and, as expected, there were no  
148 bands observed in ExI events. Three ExII events and four ExIII events showed WT with 920 bp  
149 bands, respectively. Also, nine ExIV events showed WT bands. Concurrent with increased  
150 transformation efficiency, more WT amplicons were observed in ExV than the other  
151 experiments with twenty events exhibiting WT bands (Figure 2d). The proper orientation of  
152 inserted *BleoR* at the 3' end of *MKK2* was evaluated by the second RT-PCR experiment in which  
153 pDDP was designed as the positive control (Figure 2e and f). There was no 413 bp amplicon  
154 spanning exon 7 of *MKK2* to a point within *BleoR* (indicative of correct *BleoR* orientation) shown  
155 in ExI events. ExII events showed only one 413 bp amplification, but none of the ExIII events  
156 showed the desired band. Three positive events were observed in ExIV. However, in ExV, ten  
157 events showed the desired bands (Figure 2f).

158 Relying on predicting the lack of CRISPR off-target and verifying the absence of *BleoR*  
159 integration elsewhere in the poplar genome (Supplementary Table 1), Southern blotting was  
160 performed using a *BleoR*-specific probe for all recovered events (Figure 2g and h). In addition to  
161 validating the *BleoR* knock-in in the recovered events, a single band for each event also proved  
162 the precise knock-in in desired positions with one or more copy numbers, indicating the lack of  
163 *BleoR* in the off-target sites.

164 Overall, these results further support the concept that the overexpression of *CtIP* and  
165 *MER11* and the disruption of *XRCC4* resulted in increased *BleoR* knock-in efficiency when  
166 comparing ExV results to the others. To further validate HDR in the events, TaqMan real-time  
167 PCR was utilized with two probes, FAM1 and FAM2, for the 5' and 3'-ends of the *BleoR* CDS  
168 (Figure 3a). Transformants exhibiting both FAM1 and FAM2 fluorescent signals were assumed  
169 to be fully edited, those exhibiting only FAM1 or FAM2 were considered to be partially edited,  
170 and those with no FAM1 or FAM2 signals were assumed to be either mutants or WT (Figure 3b).  
171 In ExI, the averages of fluorescent signal numbers of FAM1 and FAM2  $\Delta\Delta Ct$  were between 4 to  
172 8 (Supplementary Figure 3a), and most events exhibited as the mutant or WT, with a few partial  
173 FAM1 or FAM2 fluorescence (Figure 3c). The ExII and ExIII events showed enhanced fully and  
174 partially edited FAM signal numbers (Figures 3d, and e; Supplementary Figures 3b and c). In ExII,  
175 there were four fully edited events, four FAM1 partial edited events, and four FAM2 partial  
176 edited events (Supplementary Figure 9a). In ExIII, three fully edited events, five FAM1 partial  
177 edited events, and three FAM2 partial edited events were observed (Supplementary Figure 9b).  
178 In ExIV, the signal density of edited events increased significantly (Figure 3f). The mean  
179 fluorescent FAM1 and FAM2 signal numbers showed an increase of about 20 and 15,  
180 respectively (Supplementary Figure 3d). In total, nine fully edited events, seven FAM1 partial  
181 edited events, and four FAM2 partial edited events (Supplementary Figure 9c) were detected.  
182 Finally, the FAM signal densities of fully edited transformants in ExV were increased (Figure 3g)  
183 with means about 21 and 19, respectively (Supplementary Figure 3e), and fifteen fully edited  
184 events were discovered (Supplementary Figures 9d and 10). Furthermore, total FAM  
185 fluorescent signals (FAM1, FAM2, and FAM1&2) indicated an increasing trend of HDR  
186 occurrence through these experiments (ExI to ExV) (Figure 3h). These results were further

187 validated by Sanger sequencing of the amplified regions followed by multisequence alignment  
188 (Supplementary Figures 4 – 8).

189 Previously, HDR efficiency was improved ten-fold in tomatoes, and 35S promoter was  
190 integrated upstream of the *ANT1* gene <sup>2</sup>. While some reports on *Populus* genome editing are  
191 limited only to knock-out genes and mutations that happened by Cas9 and Cas12a <sup>13,23,28</sup>, the  
192 present study reports improving HDR efficiency for gene knock-ins in poplar. Estimating HDR  
193 efficiency was achieved by measuring the exogenous *BleoR* expression using real-time PCR and  
194 calculating the ratio of 100-fold of *BleoR* expression  $\Delta\Delta Ct$  mean:31, determining the percentage  
195 of *BleoR* expression  $\Delta\Delta Ct$  mean (HDR%) for each event (Supplementary Table 2a). The resulted  
196 HDR% from all events were then analyzed by One way-ANOVA, analyzing HDR% efficiency  
197 (Figure 3i; Supplementary Table 2b). Regarding improving the expression of HDR factors leading  
198 to increases in HDR efficiency <sup>29</sup>, previous studies have shown that HDR efficiency could be  
199 improved up to 19-fold by inhibiting NHEJ factors in mammalian systems <sup>30</sup>. While Tran et al.<sup>15</sup>  
200 showed at least a 2-fold increase in HDR resulted from CtIP-Cas9 and MRE11-Cas9 fusions in  
201 human cells, here, the mean expression of *BleoR* increased from -1.23% in ExI to 4.40% (~4-fold)  
202 in ExII and 6.11% (~5-fold) in ExIII. When fusing both CtIP and MRE11 with Cas9, the mean  
203 expression in ExIV raised to 19.07% (~16-fold compared to ExI) in this study. Finally, while Qi et  
204 al. <sup>17</sup> reported 5~16-fold or 3~4-fold enhancement in HDR in *Arabidopsis* by knocking-out the  
205 *Ku70* or *Lig4*, this study demonstrated that *XRCC4* deficiency in conjunction with CtIP and  
206 MRE11 overexpression (ExV) raised the HDR by 48.90% (~40-fold than ExI). Overall, *XRCC4*  
207 deficiency, together with the overexpression of *CtIP* and *MRE11*, was the most efficient system  
208 for HDR-based integration resulting in more HDR occurrence than HDR expression effectors *CtIP*  
209 and *MRE11* alone or together (Figure 3i).

210 To evaluate the effect of *CtIP* and *MRE11* overexpression and simultaneous *XRCC4*  
211 suppression on CRISPR-induced polymorphisms, we analyzed the variant genotypes and protein  
212 effects within the 5' and 3' homologous arms and also the knocked-in fragments from the  
213 grown buds through all experiments (Supplementary Table 3). The increased HDR efficiency  
214 observed over the subsequent experiments from ExI to ExV suggested a shift from higher  
215 Insertion/Deletion (InDel) polymorphisms occurrence in the 5' region of knocked-in fragments

216 (*BleoR*) to the 3' region (6xHis and PolyA) (Figure 4a). The result of this shift was less functional  
217 disruption of *BleoR* resulting from InDels localized more 3' rather than 5', resulting in  
218 more *BleoR* expression numbers in ExV events than the other experiments. Furthermore, the  
219 InDels number mean comparisons revealed that the promoted HDR by *XRCC4* deficiency caused  
220 a 7-fold decrease in InDels in ExV events compared to considerably ExI events and also the  
221 other experiments (Figure 4b). We then calculated the total number of polymorphisms  
222 throughout the homologous arms in each experiment. ExIV and ExV events resulted in the least  
223 numbers of polymorphisms, significantly 2.3-fold and 3.8-fold less than ExI events, respectively  
224 (Figure 4c). More polymorphisms also occurred within ExII and -III than ExIV and -V (Figure 4c).  
225 Examining all polymorphism classes observed in the data (Supplementary Table 4), the highest  
226 frequency of polymorphisms occurred in ExI events and the least within ExV events, with the  
227 majority being InDels (Figure 4d). Moreover, the whisker plot of total polymorphisms presented  
228 the maximum of polymorphisms through ExI events and the minimum of those in ExV events  
229 (Figure 4d).

230 It has been shown that *MAPKs* genes direct cellular responses against abiotic stresses  
231 such as salinity<sup>22,31</sup>. The *MKK2* functional analysis and comparing them with WT poplars  
232 revealed a regular expression (~95%-100%) before stress in successfully transformed events  
233 from ExII, -IV, and -V, and stable overexpression induced by salt stress application (168%-173%).  
234 In addition, no loss of salt stress tolerance was observed in the successfully transformed events  
235 confirming that *MKK2* remained functional and no deleterious mutations occurred following  
236 HDR across exons 7, 8, and 9 (Supplementary Figure 17). Concerning unidentified bands in  
237 Figures 2d and f, the events II#6, IV#90, V#37, and V#53 could not resist salinity due  
238 to *MKK2* mutations and withered. In addition, Sun et al.<sup>32</sup> reported that the *MKK2* family genes  
239 play vital roles in maize development. Thus, a lack of *MKK2* expression may result in reduced  
240 plant stem length and diameter. Our results showed no significant differences between  
241 surviving recovered events before and after salt stress means and WT poplars in stem lengths  
242 and diameters, which validated the precise editing of the *MKK2* locus by efficient HDR within  
243 exons 7, 8, and 9 (Supplementary Figure 17 and Table 5).



244 In summary, this study demonstrated that NHEJ factor deficiency, together with HDR  
245 factor overexpression, results in enhanced HDR efficiency up to a 40-fold increase and  
246 dramatically expands our capacity for trait improvement in poplar. We also proved that HDR  
247 promotion by the overexpressing HDR factors (ExII, ExIII, and ExIV) drives the resected DNA  
248 repair through homologous arms with 1.7-, 2.5-, and 1.5-fold respectively fewer InDels than ExI,  
249 but not as much as the HDR factors overexpressing together with NHEJ factors deficiency (ExV)  
250 with 7-fold fewer. This breakthrough technology will prove helpful in biotechnological research,  
251 forest conservation of tree species, crop improvement and development, and mammalians.

## 252 References

- 253 1. Li, S. *et al.* Precise gene replacement in rice by RNA transcript-templated homologous  
254 recombination. *Nat Biotechnol* **37**, 445–450; 10.1038/s41587-019-0065-7 (2019).
- 255 2. Cermak, T., Baltes, N. J., Cegan, R., Zhang, Y. & Voytas, D. F. High-frequency, precise  
256 modification of the tomato genome. *Genome Biol* **16**, 232; 10.1186/s13059-015-0796-9  
257 (2015).
- 258 3. Bewg, W. P., Ci, D. & Tsai, C.-J. Genome Editing in Trees. From Multiple Repair Pathways  
259 to Long-Term Stability. *Frontiers in Plant Science* **9**; 10.3389/fpls.2018.01732 (2018).
- 260 4. Zhou, X., Jacobs, T. B., Xue, L.-J., Harding, S. A. & Tsai, C.-J. Exploiting SNP s for biallelic  
261 CRISPR mutations in the outcrossing woody perennial *Populus* reveals 4 -  
262 coumarate. CoA ligase specificity and redundancy. *New Phytologist* **208**, 298–301 (2015).
- 263 5. Schiml, S., Fauser, F. & Puchta, H. The CRISPR/Cas system can be used as nuclease for in  
264 planta gene targeting and as paired nickases for directed mutagenesis in Arabidopsis resulting  
265 in heritable progeny. *Plant J* **80**, 1139–1150; 10.1111/tpj.12704 (2014).
- 266 6. Li, J. *et al.* Gene replacements and insertions in rice by intron targeting using CRISPR-Cas9.  
267 *Nat Plants* **2**, 16139; 10.1038/nplants.2016.139 (2016).
- 268 7. Yang, D. *et al.* Enrichment of G2/M cell cycle phase in human pluripotent stem cells  
269 enhances HDR-mediated gene repair with customizable endonucleases. *Sci Rep* **6**, 21264;  
270 10.1038/srep21264 (2016).

- 271 8. Gil-Humanes, J. *et al.* High-efficiency gene targeting in hexaploid wheat using DNA  
272 replicons and CRISPR/Cas9. *Plant J* **89**, 1251–1262; 10.1111/tpj.13446 (2017).
- 273 9. Svitashv, S., Schwartz, C., Lenderts, B., Young, J. K. & Cigan, A. M. Genome editing in  
274 maize directed by CRISPR-Cas9 ribonucleoprotein complexes. *Nat Commun* **7**;  
275 10.1038/ncomms13274 (2016).
- 276 10. van Vu, T. *et al.* Highly efficient homology-directed repair using CRISPR/Cpf1-geminiviral  
277 replicon in tomato. *Plant Biotechnol J*; 10.1111/pbi.13373 (2020).
- 278 11. Movahedi, A. *et al.* Expression of the chickpea CarNAC3 gene enhances salinity and drought  
279 tolerance in transgenic poplars. *Plant Cell Tiss Org* **120**, 141–154; 10.1007/s11240-014-  
280 0588-z (2015).
- 281 12. Movahedi, A., Zhang, J. X., Amirian, R. & Zhuge, Q. An efficient Agrobacterium-mediated  
282 transformation system for poplar. *Int J Mol Sci* **15**, 10780–10793; 10.3390/ijms150610780  
283 (2014).
- 284 13. An, Y. *et al.* Efficient genome editing in populus using CRISPR/Cas12a. *Front Plant Sci* **11**,  
285 593938; 10.3389/fpls.2020.593938 (2020).
- 286 14. Ali, Z. *et al.* Fusion of the Cas9 endonuclease and the VirD2 relaxase facilitates homology-  
287 directed repair for precise genome engineering in rice. *Commun Biol* **3**; 10.1038/s42003-020-  
288 0768-9 (2020).
- 289 15. Tran, N. T. *et al.* Enhancement of precise gene editing by the association of Cas9 with  
290 homologous recombination factors. *Front Genet* **10**; 10.3389/fgene.2019.00365 (2019).
- 291 16. Hartun, F. & Puchta, H. Isolation of the complete cDNA of the Mre11 homologue of  
292 Arabidopsis (Accession No. AJ243822) indicates conservation of DNA recombination  
293 mechanisms between plants and other eucaryotes. (PGR99-132). *Plant Physiol* **121**, 312  
294 (1999).
- 295 17. Qi, Y. *et al.* Increasing frequencies of site-specific mutagenesis and gene targeting in  
296 Arabidopsis by manipulating DNA repair pathways. *Genome Res* **23**, 547–554;  
297 10.1101/gr.145557.112 (2013).

- 298 18. Grawunder, U., Zimmer, D., Kulesza, P. & Lieber, M. R. Requirement for an interaction of  
299 XRCC4 with DNA ligase IV for wild-type V(D)J recombination and DNA double-strand  
300 break repair in vivo. *J Biol Chem* **273**, 24708–24714; 10.1074/jbc.273.38.24708 (1998).
- 301 19. West, C. E., Waterworth, W. M., Jiang, Q. & Bray, C. M. Arabidopsis DNA ligase IV is  
302 induced by gamma-irradiation and interacts with an Arabidopsis homologue of the double  
303 strand break repair protein XRCC4. *Plant J* **24**, 67–78; 10.1046/j.1365-313x.2000.00856.x  
304 (2000).
- 305 20. Pierce, A. J., Hu, P., Han, M., Ellis, N. & Jasin, M. Ku DNA end-binding protein modulates  
306 homologous repair of double-strand breaks in mammalian cells. *Genes Dev* **15**, 3237–3242;  
307 10.1101/gad.946401 (2001).
- 308 21. Chen, X. Y. *et al.* The Liriodendron chinense MKK2 Gene Enhances Arabidopsis thaliana  
309 Salt Resistance. *Forests* **11**; 10.3390/f11111160 (2020).
- 310 22. Mohanta, T. K., Arora, P. K., Mohanta, N., Parida, P. & Bae, H. Identification of new  
311 members of the MAPK gene family in plants shows diverse conserved domains and novel  
312 activation loop variants. *BMC genomics* **16**, 58; 10.1186/s12864-015-1244-7 (2015).
- 313 23. Di Fan *et al.* Efficient CRISPR/Cas9-mediated Targeted Mutagenesis in Populus in the First  
314 Generation. *Sci Rep-Uk* **5**, 12217; 10.1038/srep12217 (2015).
- 315 24. Hsu, P. D. *et al.* DNA targeting specificity of RNA-guided Cas9 nucleases. *Nat Biotechnol*  
316 **31**, 827–832; 10.1038/nbt.2647 (2013).
- 317 25. Doench, J. G. *et al.* Rational design of highly active sgRNAs for CRISPR-Cas9-mediated  
318 gene inactivation. *Nat Biotechnol* **32**, 1262–1267; 10.1038/nbt.3026 (2014).
- 319 26. Song, F. & Stieger, K. Optimizing the DNA Donor Template for Homology-Directed Repair  
320 of Double-Strand Breaks. *Mol Ther Nucleic Acids* **7**, 53–60; 10.1016/j.omtn.2017.02.006  
321 (2017).
- 322 27. Hajiahmadi, Z. *et al.* Strategies to Increase On-Target and Reduce Off-Target Effects of the  
323 CRISPR/Cas9 System in Plants. *Int J Mol Sci* **20**; 10.3390/ijms20153719 (2019).
- 324 28. Liu, T. *et al.* Highly efficient CRISPR/Cas9-mediated targeted mutagenesis of multiple genes  
325 in Populus. *Yi chuan = Hereditas* **37**, 1044–1052; 10.16288/j.ycz.15-303 (2015).

- 326 29. Shao, S. M. *et al.* Enhancing CRISPR/Cas9-mediated homology-directed repair in  
327 mammalian cells by expressing *Saccharomyces cerevisiae* Rad52. *Int J Biochem Cell B* **92**,  
328 43–52; 10.1016/j.biocel.2017.09.012 (2017).
- 329 30. Maruyama, T. *et al.* Increasing the efficiency of precise genome editing with CRISPR-Cas9  
330 by inhibition of nonhomologous end joining. *Nat Biotechnol* **33**, 538–542; 10.1038/nbt.3190  
331 (2015).
- 332 31. Teige, M. *et al.* The MKK2 pathway mediates cold and salt stress signaling in *Arabidopsis*.  
333 *Mol Cell* **15**, 141–152; 10.1016/j.molcel.2004.06.023 (2004).
- 334 32. Sun, W. *et al.* Expression analysis of genes encoding mitogen-activated protein kinases in  
335 maize provides a key link between abiotic stress signaling and plant reproduction. *Funct*  
336 *Integr Genomic* **15**, 107–120; 10.1007/s10142-014-0410-3 (2015).
- 337 33. Zhang, J. P. *et al.* Efficient precise knockin with a double cut HDR donor after  
338 CRISPR/Cas9-mediated double-stranded DNA cleavage. *Genome Biol* **18**, 35;  
339 10.1186/s13059-017-1164-8 (2017).
- 340 34. Xie, K. B. & Yang, Y. N. RNA-Guided Genome Editing in Plants Using a CRISPRCas  
341 System. *Mol Plant* **6**, 1975–1983; 10.1093/mp/sst119 (2013).
- 342 35. Sambrook, J., Fritsch, E. F. & Maniatis, T. *Molecular cloning. a laboratory manual*. 2nd ed.  
343 (Cold Spring Harbor Laboratory Press, Cold Spring Harbor, NY, 1989).

344

#### 345 **Acknowledgments**

346 This project was funded by the National Key Program on Transgenic Research  
347 (2018ZX08020002), the National Natural Science Foundation of China (No. 31971682, 31570650  
348 and 2045210646).

349

#### 350 **Author contribution**

351 A.M. conceived, planned, and coordinated the project, performed data analysis, and  
352 wrote the draft, and finalized the manuscript. H.W. carried out the experiments and  
353 contributed to data analysis and curation. X.Z., J.C.F., and Z.H.C. validated and contributed to

354 data analysis and curation, revised and finalized the manuscript. Z.M., W.S., J.Z., D.L. reviewed  
355 and edited the manuscript. B.G. validated and contributed to data curation, review, and editing.  
356 R.K.V., L.Y., and Q.Z. planned, coordinated, contributed to data curation, and revised and  
357 finalized the manuscript. A.M., H.W., X.Z., and J.C.F. contributed equally as the first author.

358

### 359 **Competing interests**

360 The authors declare that they have no conflict of interest.

### 361 **Supplementary Information**

362 **Supplementary Figure 1:** Schematic DDP and pDDP. pDDP included DDP ligated into  
363 pRGEB31 by restriction enzyme cloning method.

364 **Supplementary Figure 2:** Schematics of constructed cassettes and plasmids. **a**, pgRNA  
365 included the *MKK2* target seed and Cas9. **b**, pgCtIP plasmid including CtIP cassette. **c**, pgMR  
366 plasmid, including MR cassette. **d**, pgCtMR plasmid including CtMR cassette. **e**, pggCtMR  
367 plasmid, including XRCC4 cassette.

368 **Supplementary Figure 3:** Box-and-whisker (Min-Max) plots of one-dimensional FAM  
369 delta-delta Ct signals in designed experiments. All signals were calculated as quadruplicates.

370 **Supplementary Figure 4:** Alignment of events involved in experiment I.

371 **Supplementary Figure 5:** Alignment of events involved in experiment II.

372 **Supplementary Figure 6:** Alignment of events involved in experiment III.

373 **Supplementary Figure 7:** Alignment of events involved in experiment IV.

374 **Supplementary Figure 8:** Alignment of events involved in experiment V.

375 **Supplementary Figure 9:** Schematics of sequence analyzing of triggered events from  
376 different experiments. **a**, Sequence analysis of triggered events included in EXII reveals one  
377 recovered event. **b**, Sequence analysis of triggered events included in EXIII reveals one  
378 recovered event. **c**, Sequence analysis of triggered events included in EXIV reveals four  
379 recovered events. **d**, Sequence analysis of triggered events included in EXV reveals 12  
380 recovered events.

381 **Supplementary Figure 10:** Chromatogram alignments of events included in experiment  
382 V.

383           **Supplementary Figure 11:** Schematic constructions of DDP and pDDP fragments.

384           **Supplementary Figure 12:** Constructions of CtIP, MRE11, CtIP+MRE11, and XRCC4  
385 cassettes with their primers and oligos.

386           **Supplementary Figure 13:** Constructions of designed plasmids pgCtIP and pgMR with  
387 their primers.

388           **Supplementary Figure 14:** Constructions of designed plasmids pgCtMR and pggCtMR  
389 with their primers.

390           **Supplementary Figure 15:** Schematic of TaqMan real-time PCR FAM and VIC target  
391 assays in this study. Yellow rectangles exhibited CDS.

392           **Supplementary Figure 16:** Uncropped agarose gel images used in figure 2a, d, f, and h. **a**,  
393 Western blotting. **b** and **c**, RT-PCR. **d**, Southern blotting; Red dashed boxes indicate the cropped  
394 sections handled in figures.

395           **Supplementary Figure 17:** Radar diagrams of *MKK2* expressions, stem lengths, and -  
396 diameters from WT and survived recovered events after NaCl treatment. No significant  
397 differences in *MKK2* expressions and phenotypic changes before and after salt stress between  
398 WT and survived recovered events confirmed the exact genetic engineering induced by efficient  
399 HDR to keep *MKK2* exons arrangement.

400           **Supplementary Table 1:** CRISPR sites located on 3' region of *MKK2*. The yellow highlight  
401 reveals the selected CRISPR target in this study.

402           **Supplementary Table 2:** The HDR efficiency calculated in this study. **a**, The percentage  
403 of *BleoR* expression  $\Delta\Delta Ct$  mean (HDR%) achieved from all grown buds on Zeocin. Each event  
404 was investigated with three technical repeats; To balance the variation of each experiment  
405 event number, we considered zero for all the *BleoR* expressions up to 31 (Equals to ExV events).  
406 **b**, One way-ANOVA descriptive statistics computed from all events HDR% has been used for  
407 analyzing each experiments HDR% efficiency in **Figure 3i**.

408           **Supplementary Table 3:** Polymorphisms detected in homologous arms happened by  
409 HDR through all experiments grown buds.

410           **Supplementary Table 4:** Total variant genotyping happened by CRISPR-induced  
411 polymorphisms through all experiments grown buds.

412 **Supplementary Table 5:** The raw data of RT-qPCR of *MKK2* expressions and phenotypic  
413 analyzes in WT and survived recovered events before and after salt stress. **a**, *MKK2* expressions  
414 (%) Rt-qPCR; All events were analyzed in triplicates. **b** and **c**, Stem lengths and diameters before  
415 and after stress. **d**, **e**, and **f**, Duncan test tables for *MKK2* expression, stem length, and stem  
416 diameters, respectively. The mean of before and after treatments from each event was  
417 compared with WT as the control.

418 **Supplementary Table 6:** Oligos and primers used in this study.

## 419 **Methods**

### 420 **Design of Experiments and Construct Transformation**

#### 421 *Design of Experiments*

422 This study was based on promoting HDR efficiency in poplar using designed plasmid  
423 harboring gRNA (pgRNA) (Supplementary Figure 2a), plasmids (pgCtIP, pgMR, pggCtMR)  
424 harboring gRNA, and HDR factors CtIP and MRE11 (Supplementary Figures 2b, c, and d), and  
425 plasmid (pggCtMR) harboring gRNA to target NHEJ factor XRCC4 (Supplementary Figure 2e). All  
426 plasmids included gRNA to target *MKK2* locus on *Populus trichocarpa*. The designed plasmids  
427 were then classified into five experiments: ExI including pgRNA, ExII including pgCtIP, ExIII  
428 including pgMR, ExIV including pgCtMR, and ExV including pggCtMR.

429

#### 430 *Construction of DDP and pDDP*

431 To produce DDP (Supplementary Figure 1), five fragments were designed, constructed,  
432 and ligated (Supplementary Figure 11a). To construct fragment one, the OsU3 promoter and  
433 gRNA scaffold were isolated from pRGEB31 (Supplementary Table 6, OS1-F and -R) flanked  
434 by *HindIII* and *BamHI* sites. To increase the amount of DDP in the cell nucleus and improve HDR  
435 efficiency, the cleavage property of Cas9 was harnessed by designing two special gRNA targets  
436 1 and -2 (No on- and -off-targets through the whole poplar genome and only detect special  
437 targets besides of DDP) in addition to the DDP<sup>33</sup> (Supplementary Figure 1). Special gRNA oligos  
438 (Sgo1-F and -R) (Supplementary Figure 11a; Supplementary Table 6, special gRNA oligo1-F and -  
439 R) were then designed as previously described<sup>34</sup> to form special gRNA target1 (Sgt1), which was  
440 then ligated into the fragment one. To construct fragment two, we decided to isolate 400 bp

441 nucleotides of upstream of the target from the poplar genome (5' homology arm)  
442 (Supplementary Table 6, 5' Ho-F-1 and -R-1). Afterward, regular PCR was carried out using  
443 primers with the extensions of *Bam*HI-special target1 (St1) and 39 bp from complemented 5' of  
444 fragment 3 (Supplementary Table 6, 5' Ho-F-2 and -R-2) (Supplementary Figure 11a). To  
445 construct fragment three, we isolated the *BleoR* CDS (Zeocin resistance gene) from the PCR®-  
446 XL-Topo® vector (Supplementary Table 6, *BleoR*-1092F and -2276R). Then, overlap-PCR was  
447 performed (Supplementary Table 6, BP1,2,3-F and -R) using the isolated *BleoR* CDS as a  
448 template to include sequences rather than remaining nucleotides from exon 8 (Leu-Ala-Thr-  
449 Leu-Lys-Thr-Cys) and exon 9 (Val-Leu-Val-Lys-Met) for adding to the 5' *BleoR* CDS region and  
450 also 18 bp 6xHis tag and 30 bp Poly A tail for adding to the 3' *BleoR* CDS area (Supplementary  
451 Figures 1 and 11a). We decided to isolate 400 bp nucleotides of downstream of the target from  
452 the poplar genome (3' homology arm) (Supplementary Table 6, 3' Ho-F-1 and -R-1) to assemble  
453 fragment four. Then, PCR was performed to extend 3' homology arm with 30 bp Poly-T  
454 and *Nco*I-special target2 (St2) sequences (Supplementary Table 6, Ho-F-2 and -R-2)  
455 (Supplementary Figure 11a). Finally, standard PCR was used to isolate the OsU3 promoter and  
456 gRNA scaffold from pRGEB31 (Supplementary Table 6, Os2-F and Os2-R). Moreover, special  
457 gRNA oligos were designed (Sgo2-F and -R) (Supplementary Figure 11a; Supplementary Table 6,  
458 special gRNA oligo2-F and -R) again as previously described<sup>34</sup> to form special gRNA target2  
459 (Sgt2) and ligated it into fragment five.

460 To construct the final pDDP construct, we ligated fragments two and three using PCR  
461 (Supplementary Figure 11b). For this, we designed a 39 bp overhang on fragment two that was  
462 complementary to the end of fragment three to form preliminary DDP (Supplementary Figure  
463 11b). For this reaction, PCR was prepared with 500 ng of each component. Initially, all  
464 components were used in the PCR reaction except primers, and then the fragments were  
465 denatured at 95°C for 5 minutes, followed by two annealing and extension cycles. Next, the PCR  
466 products were allowed to anneal at 68°C to avoid nonspecific hybridization amongst the long  
467 PCR products for 30 seconds, followed by extension for one minute at 74°C resulting in a  
468 double-stranded template. The primers were then added for the distal ends of fragments two  
469 and three, and PCR proceeded normally. The PCR products were then purified and ligated into



470 the pEASY vector for sequencing and confirmation. The preliminary DDP product was then  
471 ligated into fragment four as previously described and formed secondary DDP products  
472 (Supplementary Figure 11b). After sequencing and confirmation, restriction cloning was used to  
473 ligate secondary DDP products to fragments one and four (Supplementary Figure 11b). Briefly,  
474 we incubated a reaction including 50 ng of each digested fragments, 10x T4 DNA ligase buffer  
475 0.5  $\mu$ l, T4 DNA ligase (NEB) 1  $\mu$ l, and H<sub>2</sub>O to 5  $\mu$ l at 25°C for 4 hours and transferred into *E.*  
476 *Coli* DH5 $\alpha$  competent cells for sequencing and confirmation. Subsequently, the restriction  
477 cloning technique was used to merge the DDP product and pRGEB31 vector to form the pDDP  
478 vector (Supplementary Figure 11b).

#### 479 ***Synthesis of pgCtIP and pgMR***

480 To design a fused CtIP and Cas9 cassette, the CaMV35S promoter, 3xFLAG, and Cas9 CDS  
481 were isolated from pRGEB31 (Supplementary Figure 12a) using designed primers  
482 (Supplementary Table 6). CtIP CDS were then obtained using RT-PCR from the *Populus*  
483 *trichocarpa* genome (Supplementary Figure 12a; Supplementary Table 6, CtIP-F and -R). Next,  
484 the 3'UTR and PolyA fragments were isolated from the pCAG-T3-hCAS-pA plasmid  
485 (Supplementary Figure 12a; Supplementary Table 6, PolyA-F and -R). To complete pgCtIP,  
486 CaMV35S and 3xFLAG fragments were ligated using restriction cloning to form backbone 1  
487 (Supplementary Figure 13a). Next, the isolated Cas9 and the obtained CtIP CDS were also  
488 ligated, applying restriction cloning to form backbone 2 (Supplementary Figure 13a). Backbones  
489 1 and 2 were then ligated using *HindIII* restriction cloning to form backbone 3 (Supplementary  
490 Figure 13a). In the next step, the resulted backbone 3 was ligated to the assembled 3'UTR-PolyA  
491 using *StuI* restriction cloning to form the CtIP cassette (Supplementary Figures 13a and 12a).  
492 *SdaI* and *PmeI* restriction enzymes were then used to restrict the cloning of the CtIP cassette  
493 and pRGEB31 and assemble the pgCtIP plasmid (Supplementary Figures 13a and 12a).

494 To construct a fusion of MRE11 and Cas9, the CaMV35 promoter, 3xFLAG, Cas9, 3'UTR,  
495 and PolyA were isolated as previously described (Supplementary Figure 12b; Supplementary  
496 Table 6). The MRE11 CDS were obtained from *P. trichocarpa* total RNA, and RT-PCR was carried  
497 out as mentioned above (Supplementary Figure 12b; Supplementary Table 6, MRE-F and R). To  
498 complete pgMR, we ligated the isolated CaMV35S and 3xFLAG fragments concerning *XhoI*

499 endonuclease to form backbone 1 (Supplementary Figure 13b). Backbone 2 was then  
500 constructed using the isolated Cas9 and 3'UTR-PolyA fragments (Supplementary Figure 13b).  
501 Backbone 1, backbone 2, and MRE11 CDS product were then merged using *NotI* and *NdeI* (NEB)  
502 restriction cloning to form the MR cassette (Supplementary Figures 13b and 12b). Then  
503 restriction cloning with *SdaI* and *PmeI* was used to construct the pgMR plasmid (Supplementary  
504 Figures 13b and 12b).

### 505 ***Synthesis of pgCtMR and pggCtMR***

506 To construct the CtMR cassette, we prepared all the required fragments, as described  
507 above (Supplementary Figure 12c). Afterward, CaMV35S and 3xFLAG components were merged  
508 using *XhoI* restriction cloning to form backbone 1 (Supplementary Figure 14a). Backbone 1 and  
509 the already obtained MRE11 CDS product (Supplementary Table 6, MRE-F and -R) were then  
510 ligated using *NotI* restriction cloning to form backbone 2 (Supplementary Figure 14a). The  
511 isolated Cas9 and the obtained RT-PCR product CtIP CDS were ligated using *BamHI* restriction  
512 cloning to form backbone 3 (Supplementary Figure 14a). Backbone 3 and isolated 3'UTR-PolyA  
513 fragments were then used to form backbone 4 (Supplementary Figure 14a). Backbones 2 and 4  
514 were then used to construct the CtMR cassette (Supplementary Figures 14a and 12c), followed  
515 by *SdaI* and *PmeI* restriction cloning to ligate the CtMR cassettes into pRGEB31 forming the  
516 pgCtMR plasmid (Supplementary Figures 14a and 12c). To target the *XRCC4* gene  
517 and *MKK2* simultaneously, we designed one cassette, including both *XRCC4* [by adding one  
518 CRISPR site (Located on 5' region of target CDS) to mutate *XRCC4* (Non-off-target site on whole  
519 poplar genome; Activity score: 0.415; Specificity score: 100%)<sup>24,25</sup>] and *MKK2* gRNAs. PCR was  
520 then used (Supplementary Table 6, XR-Cass1-F and -R) to isolate the OsU3 promoter and gRNA  
521 scaffold from the pRGEB31 vector, and *MKK2* designed oligos (Supplementary Table  
522 6, *MKK2* Oligo-F and -R) were then used to ligate the *MKK2* target duplex (Supplementary  
523 Figure 12d). In addition, PCR was used (Supplementary Table 6; XR-Cass2-F and -R) to isolate  
524 the OsU3 promoter and gRNA scaffold again. In this process, we applied *XRCC4* designed oligos  
525 (Supplementary Table 6; *XRCC4*-Oligo1 and -2) to ligate the *XRCC4* target duplex  
526 (Supplementary figure 12d). The resulting fragments were then cloned using *KasI* restriction  
527 cloning to form *XRCC4*-Cassette (Backbone 1) (Supplementary Figures 14b and 12d). The *XRCC4*-

528 Cassette was then cloned into pRGEB31 using *HindIII* and *SdaI* restriction cloning to form  
529 backbone 2 (Supplementary Figure 14b). Finally, *SdaI* and *PmeI* restriction cloning was used to  
530 clone the CtMR cassette into backbone 2, forming the pggCtMR plasmid (Supplementary  
531 Figures 14b and 12d). Validation of construct assembly was performed using PCR, cloning into  
532 pEASY T3 vector, and DNA sequencing throughout construction.

### 533 **Transformation and targets detection**

#### 534 ***Plant transformation***

535 For transformation, poplar (*P. trichocarpa*) seedlings were cultivated in a Phytotron at  
536  $23 \pm 2^\circ\text{C}$  under a 16/8 light/dark time<sup>11</sup>. To generate transgenic lines, stems from four weeks  
537 old clones were dipped in an optimized *Agrobacterium tumefaciens* suspension (OD<sub>600</sub>: 2.5, 120  
538 min, pH ~5, Acetosyringone (As): 200  $\mu\text{M}$ )<sup>12</sup> for 5 min with gentle shaking. The transformed  
539 stems were then transferred to a semi-solid woody plant medium (WPM) containing 0.05 mg/L  
540 Indole-3-butyric acid (IBA), 0.006 mg/L thidiazuron (TDZ), 200  $\mu\text{M}$  As, and 0.5% (w/v) agar.  
541 Afterward, the stimulated stems were incubated in the dark at  $23^\circ\text{C}$  for two days. The assumed  
542 transformants were then co-cultivated in selection media enriched with 0.1 mg/L IBA, 0.006  
543 mg/L TDZ, 100 mg/L cefotaxime, 8 mg/L hygromycin, 50 mg/L Zeocin, and 0.8% (w/v) agar. Two  
544 weeks later, buds were regenerated and then sub-cultured independently in media containing  
545 0.1 mg/L IBA, 0.001 mg/L TDZ, 100 mg/L cefotaxime, 8 mg/L hygromycin, 50 mg/L Zeocin, and  
546 0.8% (w/v) agar. After six weeks, buds with four to six small leaves were transferred to MS  
547 media containing 0.1 mg/L IBA, 200 mg/L cefotaxime, 70 mg/L Zeocin, and 0.8% (w/v) agar to  
548 root. Five independent transgenic lines were used for each experiment, and each line included  
549 about ten individuals.

#### 550 ***Targets and protein detection***

551 The *MKK2* gene from *P. trichocarpa* (POPTR\_0018s05420g; Chromosome 18) was  
552 selected as a target for editing due to its vital role in transcriptional regulation against  
553 environmental stresses. Uniprot database (<https://www.uniprot.org/>) was used to download  
554 the MKK2 protein sequence and then used the BLAST database of the National Center for  
555 Biotechnology Information (NCBI) (<https://blast.ncbi.nlm.nih.gov/>) to download full DNA  
556 sequences and CDS. To detect targets, Geneious Prime® 2020.1.1 was used to analyze

557 the *MKK2* locus and detect targets relative to the whole genome of *P. trichocarpa* downloaded  
558 from NCBI (Supplementary Table 1)<sup>24,25</sup>. Geneious Prime was also used to analyze  
559 the *XRCC4* (POPTR\_0010s08650g, Chromosome 10) gene for knocking out. The PAM motif  
560 target sequences were associated with exon 8 from *MKK2* and exon 1 from *XRCC4*. Furthermore,  
561 to evaluate the effect of HDR proteins and also proper function of the edited *MKK2* gene in  
562 transformants, relevant protein sequences CtIP (POPTR\_001G269700v3), MRE11  
563 (POPTR\_0001s41800g), BRCA1 (POPTR\_0005s26150g), Rad50 (POPTR\_0001s32760g), Rad51  
564 (POPTR\_0014s06360g), Lig4 (POPTR\_0018s13870g) were downloaded from Uniprot and used to  
565 identify and isolate the proper CDS sequences from the wild type *P. trichocarpa* genome.

### 566 ***MKK2* locus target oligo synthesis**

567 For vector construction, a pair of oligos (Supplementary Table 6; *MKK2* Oligo-F and -R)  
568 were designed flanked by *Bsa*I adaptors. Synthesized oligos were then ligated into pRGE31  
569 vectors following *Bsa*I digestion<sup>34</sup> to construct pgRNA (Supplementary Figure 2a). Afterward, all  
570 vectors were transferred into *E. coli* (DH5 $\alpha$ ) and propagated under 37°C for 8 hours (Normal  
571 conditions). Vectors were then extracted using a plasmid midi kit (Qiagen, USA) and confirmed  
572 by Sanger sequencing (GeneScript, Nanjing).

### 573 **Transformation detection and confirmation**

#### 574 ***Western blotting***

575 We used Western blotting to validate the successful integration of exogenous *BleoR* in  
576 the edited events genome. For extraction of proteins, 150 mg fresh leaves of five-week-old  
577 buds were milled in 500  $\mu$ l extraction buffer (125 mM Tris, pH 6.8, 4 M Urea, 5%  $\beta$ -  
578 mercaptoethanol, 4% w/v SDS). Centrifugation was then performed at 13,000 rpm for 10 min,  
579 and the supernatant was collected for gel analysis. The extracted protein was then boiled in  
580 loading buffer (24% (w/v) glycerol, 100 mM Tris, 0.05% (w/v) Bromophenol Blue, 4% v/v  $\beta$ -  
581 mercaptoethanol, 8% (w/v) SDS) for 10 min. The extracted protein was analyzed by SDS-PAGE  
582 and visualized using Coomassie brilliant blue R-250 staining. Western blotting was then  
583 performed as described by<sup>35</sup>, using a rabbit anti-His polyclonal antibody developed in our  
584 laboratory as the primary antibody and peroxidase-conjugated goat antirabbit IgG (Zhongshan  
585 Biotechnology, Beijing, China) as the secondary antibody.

586 **RT-PCR**

587 We performed RT-PCR to verify the whole and precise integration of  
588 exogenous *BleoR* regarding designed primers and complete transcription  
589 of *BleoR* and *MKK2* resulting from efficient HDR. Total RNA (100 ng/ml) was extracted by TRIzol  
590 from young leaves of five-week-old buds grown on Zeocin-containing medium. Reverse  
591 transcription was then carried out using total RNA and oligo-dT primers to synthesize the first  
592 strand cDNA using the PrimeScript One-Step RT-PCR Kit (Ver.2, Takara Biotechnology, Dalian,  
593 China) according to the manufacturer's instructions. Afterward, two RT-PCR experiments were  
594 designed for examination of *MKK2* transcription and proper HDR. The first RT-PCR was intended  
595 to isolate a 920 bp fragment of *MKK2* CDS (Supplementary Table 6, RT-F and R) with the primers  
596 designed to amplify from the 5' region of exon 9 (15 bp) and 3' region of exon 8 (15 bp). The  
597 purpose was to show the precise attaching of exon 8 and 9 to direct the transcription  
598 of *MKK2* correctly. A second RT-PCR was performed to isolate a 413 bp fragment of  
599 recombinant CDS (Supplementary Table 6, RT-F-107 and RT-R-519). The forward primer was  
600 designed from *BleoR*, and the reverse primer was designed from exon 7 of *MKK2* with the  
601 purposes of showing the occurrence of HDR via transcription of a single mRNA  
602 from *MKK2* and *BleoR*.

603 **DNA sequencing**

604 Genomic DNA was extracted from leaves of five-week-old buds grown on Zeocin-  
605 containing medium using a DNeasy Plant Mini Kit (Qiagen, USA). The quality of the extracted  
606 genomic DNA (250–350 ng/μl) was determined by a BioDrop spectrophotometer (UK).

607 DNA sequencing was performed to evaluate and confirm the western blotting, RT-PCR,  
608 and southern blotting results. In addition, DNA sequencing was applied to assess the happened  
609 kind of mutations during genome editing. For DNA sequencing, we carried out PCR using  
610 designed primers (Supplementary Table 6, *MKK2*-S-7F and *MKK2*-S-1139R), Easy Taq  
611 polymerase (TransGene Biotech), and 50 ng of extracted genomic DNA as a template. Desired  
612 amplicons were then cloned into pEASY T3 vector (TransGen Biotech Co, Beijing, China) and  
613 used for Sanger sequencing (GeneScript, Nanjing, China), followed by alignment and data  
614 analysis (Supplementary Figures 4-10).

## 615 ***Southern blotting***

616 Southern blotting was designed and performed to confirm Western blotting results and  
617 investigate the potential off-targets through genome editing. First, genomic DNA (500 ng) was  
618 cleaved with *Bam*HI and *Hind*III at 37 °C for 4 h. The digested DNA was then used as a PCR  
619 template to label a 160 bp probe from integrated *BleoR* CDS into the genomic DNA  
620 (Supplementary Table 6; S-F and -R). DIG (digoxigenin) reagent was used for this procedure  
621 according to the manufacturer's instructions (catalog number 11745832910; Roche, Basel,  
622 Switzerland). The PCR product was then electrophoresed on a 0.8% agarose gel. Finally, the  
623 separated fragments were shifted on a Hybond N+ nylon membrane (Amersham Biosciences BV,  
624 Eindhoven, The Netherlands).

## 625 **Evaluation of HDR validity and efficiency**

### 626 ***HDR validity by TaqMan real-time PCR***

627 TaqMan real-time PCR was performed to confirm the HDR validity with the proper  
628 integration of exogenous *BleoR* in both homology arms. For this purpose, TaqMan assay  
629 applying dye labels such as FAM and VIC was performed using an Applied Biosystems real-time  
630 PCR (Applied Biosystems, Thermo Scientific, USA). High-quality grown buds genomic DNA (refer  
631 to the southern blotting) was used as the template for running TaqMan real-time PCR. In this  
632 assay, two fluorescent markers, FAM and VIC, will attach to the 5' region of the probe, while a  
633 non-fluorescent quencher (NFQ) binds to the 3' region. Therefore, we designed primers to  
634 probe two 150 bp fragments FAM1 (Supplementary Table 6, FAM1-F and -R) and FAM2  
635 (Supplementary Table 6, FAM2-F and -R). In detail, FAM1 could probe 114 bp nucleotides from  
636 the 5' homology arm and 36 bp from *BleoR*. Also, FAM2 could probe 105 bp nucleotides from  
637 the 3' homology arm and 45 bp from the *BleoR* (Supplementary Figure 15). In addition, primers  
638 (Supplementary Table 6, VIC-F, and -R) were also designed to probe one 106 bp fragment VIC  
639 on the actin gene as housekeeping (Supplementary Figure 15). Thus, all samples were analyzed  
640 in quadruplicate.

### 641 ***HDR efficiency by real-time PCR***

642 Given the purpose of this study to express an external *BleoR* gene into the desired  
643 position from the *P. trichocarpa* genome, we evaluated HDR efficiency by calculating the mean

644  $\Delta\Delta\text{Ct}$  of *BleoR* expression integrated into the poplar genome from all grown buds across five  
645 designed experiments separately. In this step, we used the synthesized cDNA (Point to the RT-  
646 PCR section) and designed primers (Supplementary Table 6, *BleoR*-52F and -151R) to carry out  
647 real-time PCR. The Fast Start Universal SYBR Green Master mix (Rox; No. 04913914001; Roche,  
648 USA) was used with three technical repeats for each event. First, we used the achieved *BleoR*  
649 expressions from all grown buds on Zeocin (*BleoR* Ct mean) and desired reference (DDP Ct  
650 mean; plasmid extracted from *E. coli*) to evaluate the main  $\Delta\text{Ct}$  Mean. Then, the control group  
651  $\Delta\text{Ct}$  was measured from a wild-type poplar for each experiment separately. Subsequently, the  
652 *BleoR* expression  $\Delta\Delta\text{Ct}$  mean was calculated by subtracting the control group  $\Delta\text{Ct}$  of the main  
653  $\Delta\text{Ct}$  Mean. Finally, to balance the variation of each experiment event number, we considered  
654 zero for all the *BleoR* expressions up to 31 (Equals to ExV events), calculating the ratio of 100-  
655 fold of *BleoR* expression  $\Delta\Delta\text{Ct}$  mean:31, determining HDR% for each event (Supplementary  
656 Table 2a). Thus, One way-ANOVA descriptive statistics computed from all events HDR% has  
657 been used for analyzing HDR% efficiency in Figure 3i (Supplementary Table 2b).

#### 658 **Salt Stress Phenotypic Evaluation**

659 Given the roles of *MKK2* in plant protection against environmental stresses<sup>22,31</sup>, and to  
660 confirm the exact HDR occurred through *MKK2* exons 7, 8, and 9 in the recovered transgenic  
661 lines, *MKK2* expression and phenotypic evaluations, specifically salt stress tolerance, were  
662 performed relative to WT, non-transformed poplar. Recovered events were planted into soil  
663 and transferred to the greenhouse. After two weeks of acclimation in a greenhouse, total RNA  
664 was isolated from WT leaves as a control and all transferred recovered events to evaluate the  
665 *MKK2* expression with RT-qPCR. For salt stress response evaluation, all recovered events were  
666 irrigated daily with 25 mM NaCl for one week following acclimation to the greenhouse. Total  
667 RNA was extracted from leaves of surviving events to perform RT-qPCR. Each reaction was  
668 performed in triplicate. Stem lengths (mm) and -diameters (mm) were also measured before  
669 and after salt stress.

670 **Statistical analysis**

671 All data were analyzed using One-Way ANOVA with Turkey post-hoc comparisons calculated by  
 672 OriginPro 2018 software (Northampton, USA). Differences were analyzed when the confidence  
 673 intervals presented no overlap of the mean values with an error value of 0.05.

674

675

676

677

678

679

680

681

682

683

684

685

686

687

688

689

690

691

692

693

694

695

696

697

698

699

700

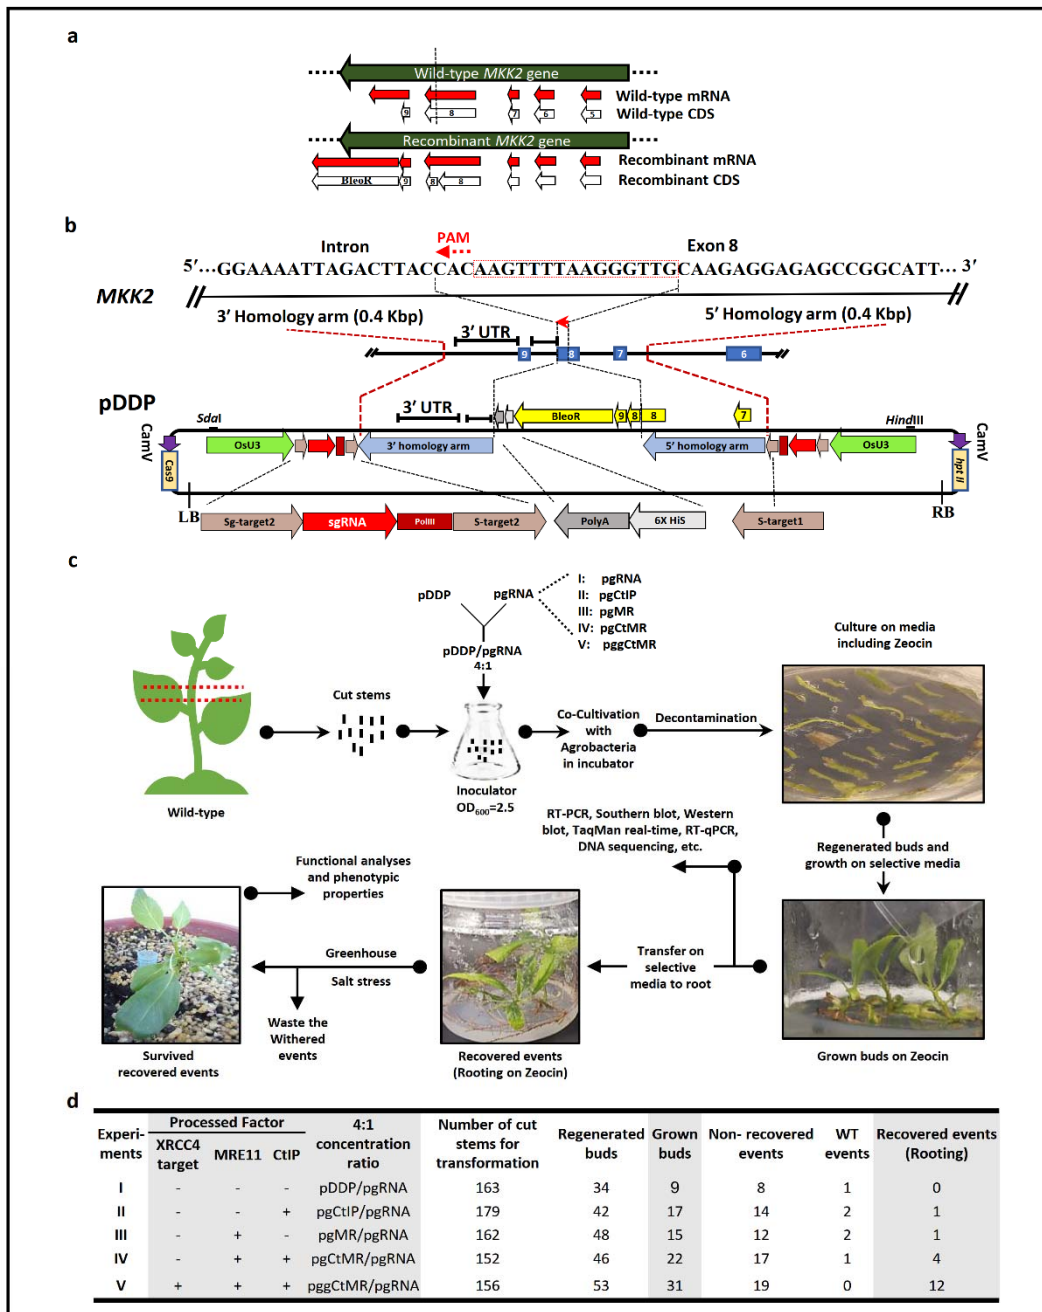



701 **Figure1: Exogenous *BleoR* CDS is integrated into the poplar genome.** a, The purpose of this study to generate Recombinant  
 702 mRNA, including *MKK2* and *BleoR*. Dash line reveals the target site. b, Protospacer Adjacent Motif (PAM) was detected at exon  
 703 8 to lead Cas9. 400 bp sequences from the up- and downstream of the CRISPR target were picked for HDR in this study. The 5'  
 704 homology arm included part sequences of the intron between exon 6 and -7, exon 7, intron sequences between exon 7 and -8,  
 705 and a part of exon 8. The 3' homology arm included intron sequences between exon 8 and -9 and 3' UTR of the *MKK2* locus up  
 706 to 400 bp. Designed DDP included remained sequences of exon 8, exon 9, *BleoR* CDS, 6xHis, and PolyA sequences flanked by the  
 707 3'- and 5' homology arms. In addition, two special targets (*S*-target1 and -2) (No on- and -off-targets through the whole poplar)  
 708 have been designed to attach besides DDP. The DDP was then ligated into the pRGE31 vector to form pDDP. c, pDDP, and  
 709 pgRNA were mixed 4:1 and introduced to the *Agrobacterium tumefaciens* to form inoculator suspension and condensed up to  
 710 OD<sub>600</sub>=2.5. The putatively edited events were regenerated on Zeocin and were allowed to bud. The grown buds were then  
 711 transferred on selective rooting media and allowed to be recovered. Recovered events were then planted on soil following by  
 712 salt stress. d, The overview of designed experiments including (I) No HDR factors, (II) overexpressed CtIP, (III) overexpressed  
 713 MRE11, (IV) overexpressed CtIP+MRE11, and (V) overexpressed CtIP+MRE11 with *XRCC4* deficiency.

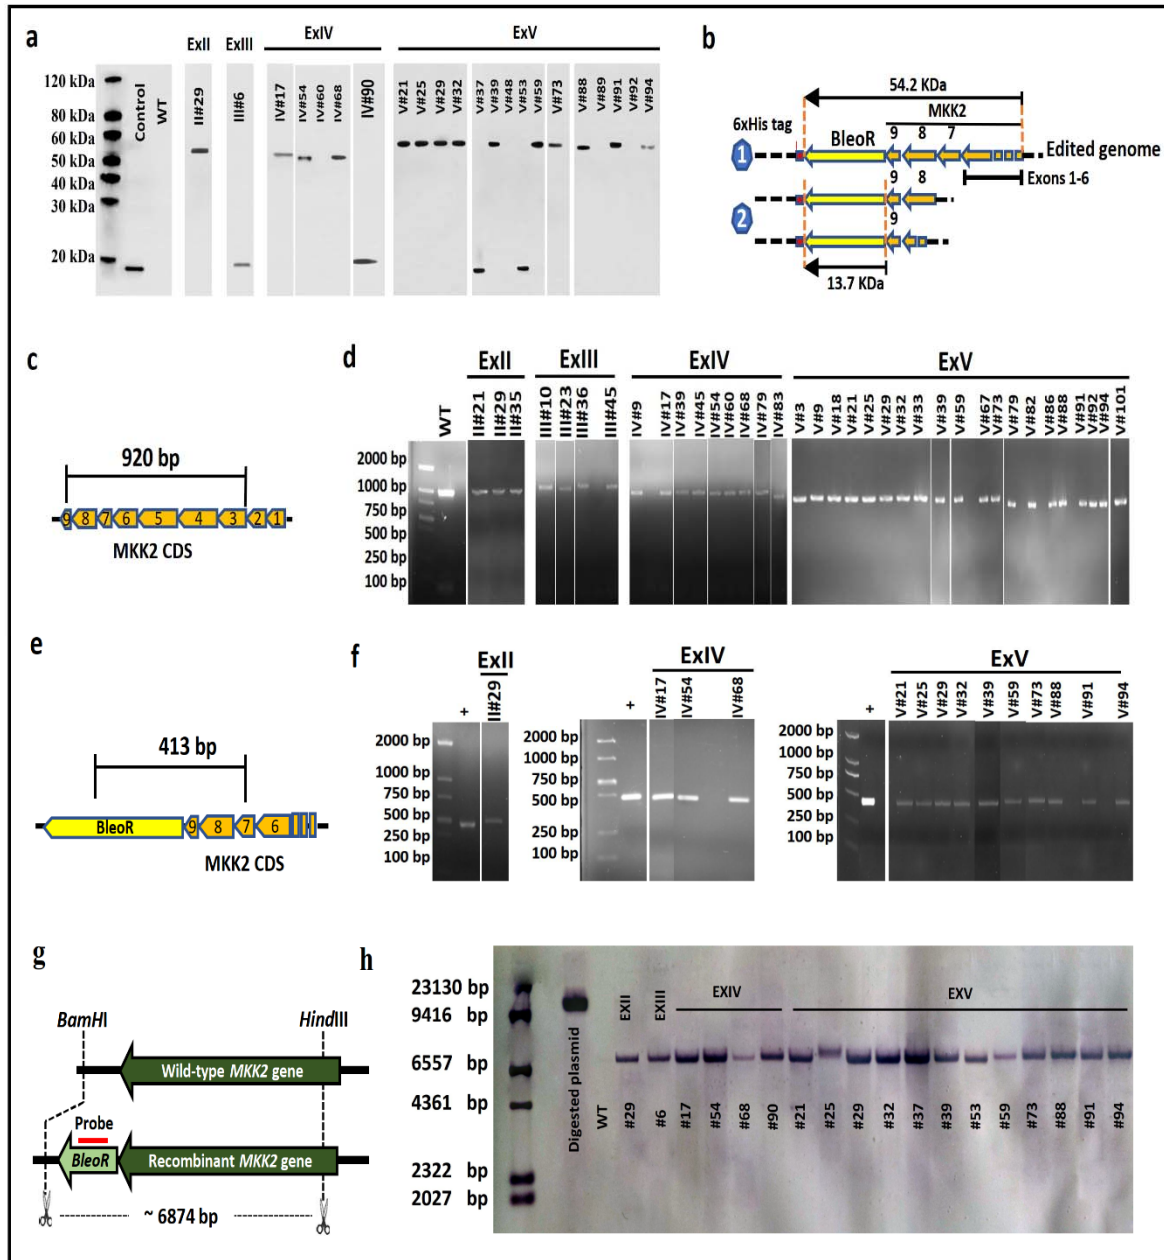

714 **Figure 2: Western blotting, RT-PCR, and Southern blotting exhibited validation of *BleoR* integration in recovered events. a,**  
 715 Recovered events exhibited *BleoR* expression by Western blotting. b, Schematic of fusion 6xHis tag with edited poplar genome

716 triggered by different constructions. Shape 1 reveals successful fusion of BleoR and MKK2 with about 54.2 kDa. Shape 2 reveals  
 717 only BleoR translation and unsuccessful fusion of MKK2 and BleoR proteins because of MKK2 disruption with about 13.7 kDa. c,  
 718 Schematic of proper HDR happening caused to attach exon 8 and 9 resulting in *MKK2* transcription in the edited genome. d, RT-  
 719 PCR exhibited the actual engineered events resulting in amplifying 920 bp of *MKK2* CDS. The  $\beta$ -actin was used as the control in  
 720 all RT-PCR assays to normalize; WT was used as the positive control. e, Schematic of proper integration in edited genome  
 721 caused to connect the BleoR to the C-terminal of MKK2. f, RT-PCR detected the recovered events with proper integration of  
 722 *BleoR* and *MKK2* with amplifying 413 bp of their transcription. The  $\beta$ -actin was used in all RT-PCR assays to normalize; pDDP  
 723 plasmid was used as the positive control. WT was used as the negative control. g, Schematic of probing *BleoR* in edited events  
 724 and WT as the control using Southern blotting. h, Southern blot proved the integrated *BleoR* into poplar genome resulted in  
 725 Western blotting. Linearized pDDP plasmid was used as the positive control; WT was used as the negative control.  
 726  
 727

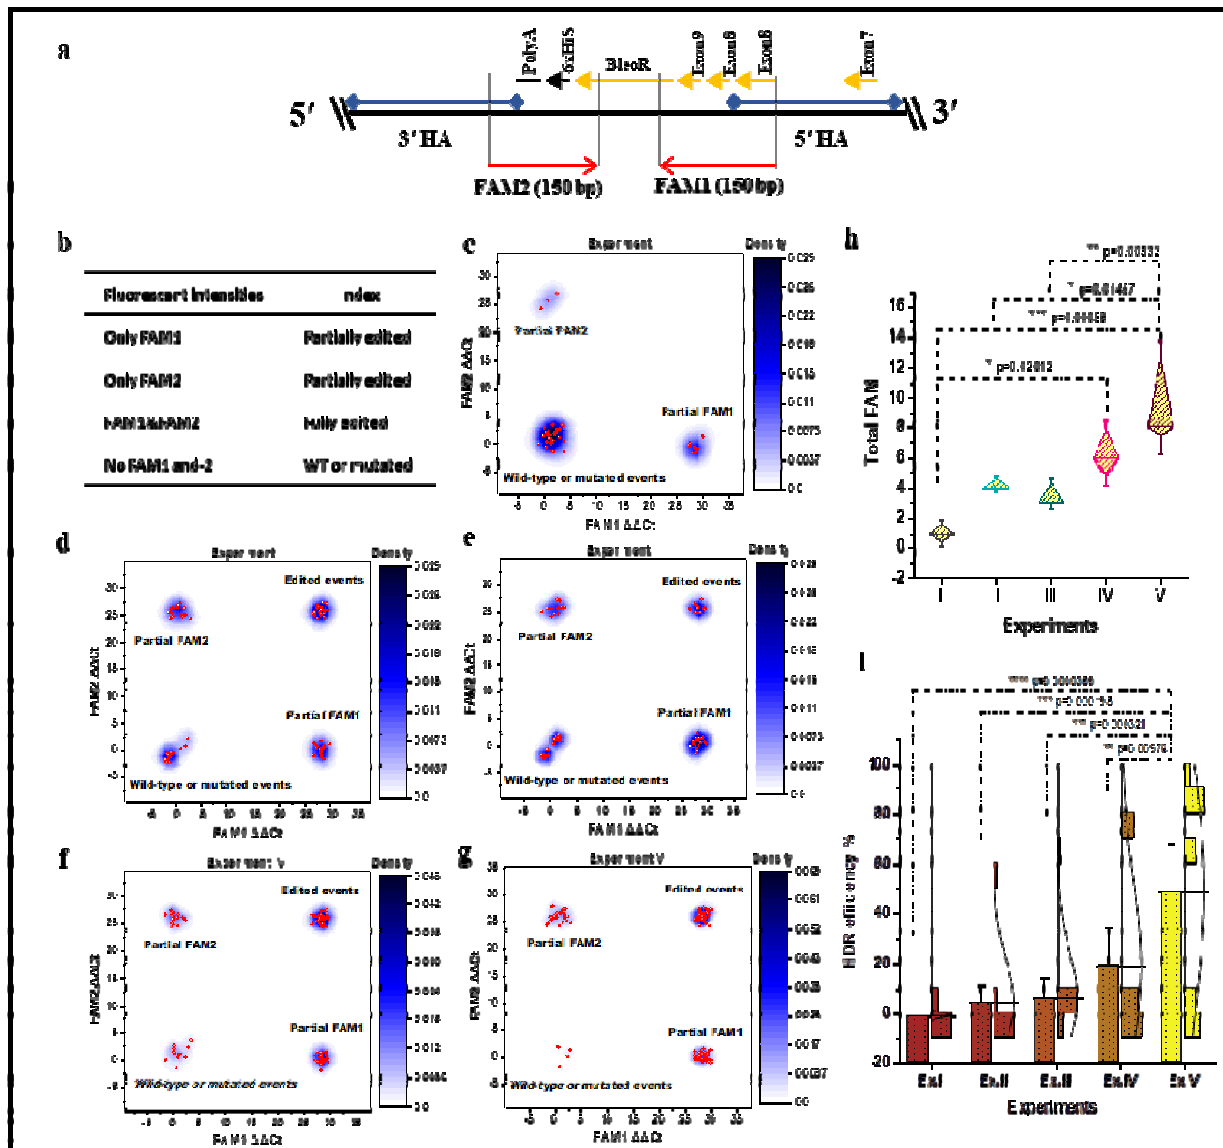

728 **Figure 3: TaqMan real-time PCR and real-time PCR assays to validate and evaluate HDR occurrence and efficiency. a,**  
 729 **Designing TaqMan real-time PCR assay to detect and evaluate HDR efficiency, included FAM1 and FAM2 DNA binding probes. b,**  
 730 **Strategy to classify edited events. c, Experiment I revealed no edited events. d, The density plot of FAM1 and -2 intensities**  
 731 **resulted from experiment II revealed an expansion in edited events against partial, mutant, and wild-types. e, The density plot**  
 732 **of FAM1 and -2 signals resulted from experiment III revealed an increased intensity of partial FAM1 events. f, Experiment IV**  
 733 **revealed a remarkable increase of edited events signals in confronting with three earlier experiments. g, The Density plot of**

734 experiment V revealed a significant increase of FAM1 and -2 intensities in edited events compared to the earlier experiments  
735 and a significant decrease in intensities in WT and mutated events. All samples were analyzed in quadruplicate. h, Diamond box,  
736 and whisker plot compared FAM signals (Partial FAM1 and -2 and FAM1&-2) detected in all experiments and showed more  
737 signals remarkably measured in ExV than ExI, II, and-III; Error bars represent SE; Asterisks represent p-value as \* $\leq$ 0.05, \*\* $\leq$ 0.01,  
738 and \*\*\* $\leq$ 0.001. i, The exogenous *BleoR* expressions in the poplar genome resulting from HDR were evaluated ( $\Delta\Delta$ Ct) and  
739 compared to exhibit HDR efficiency %. The overlap data are shown as bin bars, and the standard distribution curves are added  
740 to confirm bars. HDR efficiency plot resulted from ExV events revealed significantly more *BleoR* expression than the other  
741 experiment events. Also, ExIV meaningfully revealed more HDR happening than ExII and -III.; Error bars represent SE; Asterisks  
742 represent p-value as \*\* $\leq$ 0.01, \*\*\* $\leq$ 0.001, and \*\*\*\* $\leq$ 0.0001; Triplicate technical repeats were considered for each sample.

743

744

745

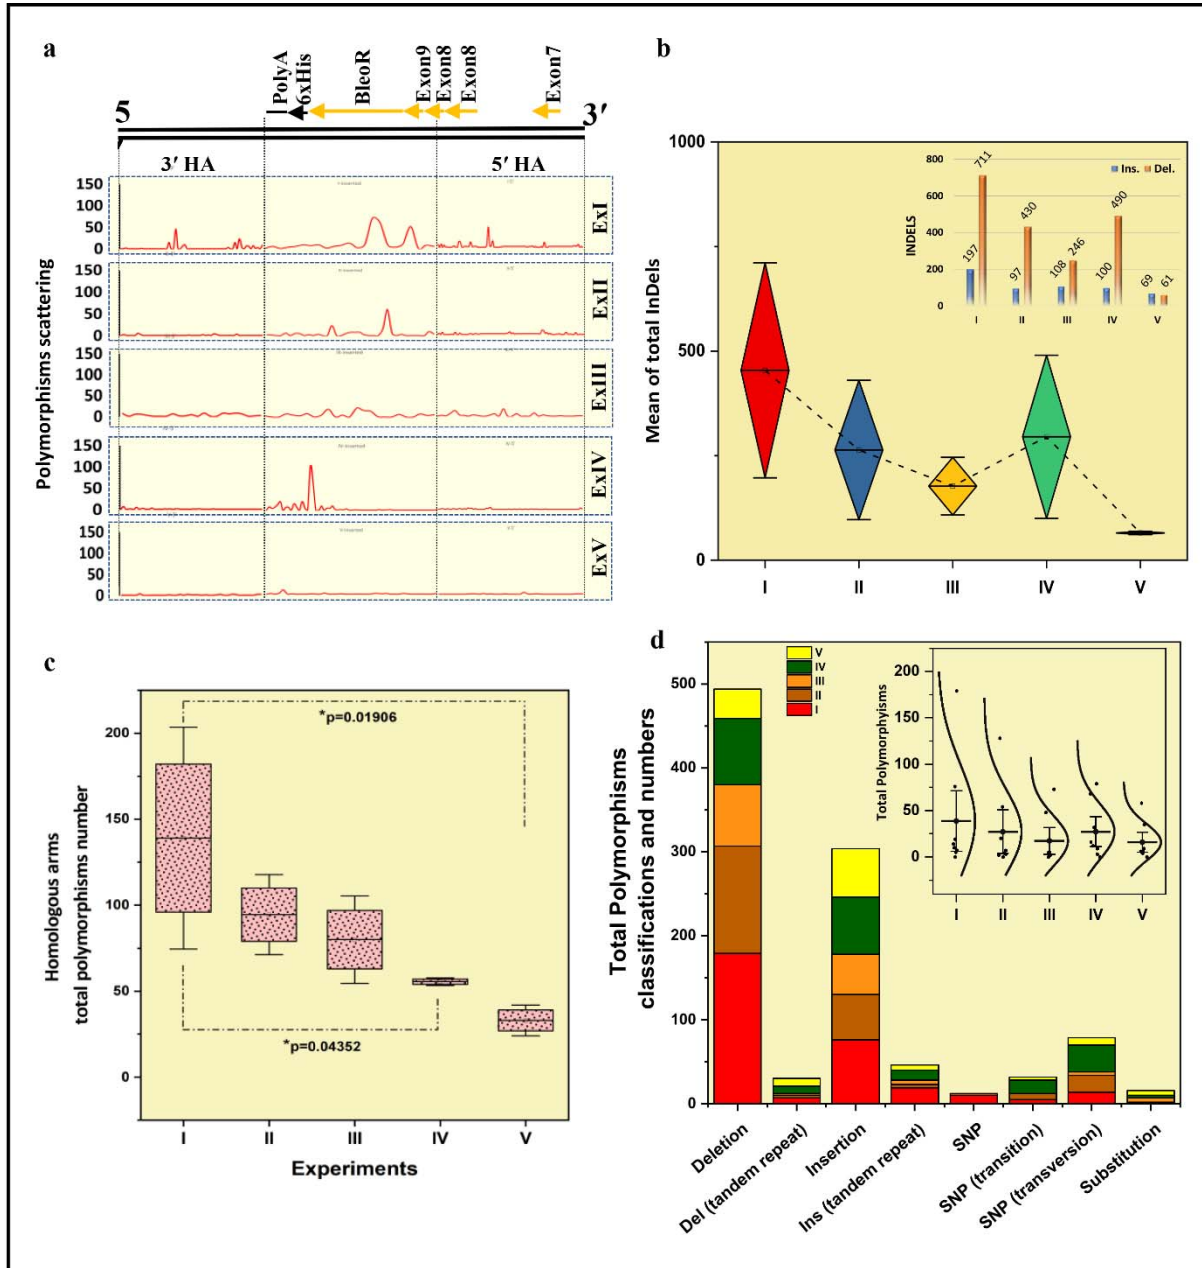

746  
747 **Figure 4: HDR promotion by *XRCC4* deficiency besides *CtIP* and *MRE11* overexpression caused a decrease in InDels**  
748 **considerably via ExV events compared to the other experiments.** **a**, Analyses of distributed InDels happened on 5' and 3'  
749 homologous arms (HA) and knocked in fragments throughout experiment events. **b**, Diamond box, and whiskers for the mean  
750 comparisons of total InDels through experiment events. The exact numbers of InDels (Excluding SNPs and substitutions) are  
751 presented via the punching column bars on the top-right corner. **c**, Identification of the happened polymorphisms through  
752 homology arms among all the experiments. Box and Whisker plot revealed that most polymorphisms happened in homology  
753 arms via ExI, and it was significantly more than those in ExV and -IV; Asterisks represent p-value as \* $\leq 0.05$ ; Error bars represent  
754 SE. **d**, Stacked column plot of total polymorphisms classification and numbers in DDP integration among all the experiments.  
755 Insertions and deletions occurred much more than the other types. SNP and substitutions occurred less than the other types.  
756 Whisker and standard curves exposed the least total polymorphisms that happened through ExV than the other experiments.
